# Supplementary material for: Molecular Modelling Hurdle in the Next-Generation Sequencing Era
Source: MDPI journal article supplement (doi:10.3390/ijms23137176), 2022-06-28
Supplement: s1 [file s1]

**Table S3.** Main MECP2 transcripts description.

| Transcript ID   | Bp     | Protein | UniProt  | RefSeq         |
|-----------------|--------|---------|----------|----------------|
| ENST00000453960 | 10,343 | 498aa   | P51608-2 | NM_001110792.2 |
| ENST00000303391 | 10,467 | 486aa   | P51608-1 | NM_004992.4    |
