# Supplementary material for: Molecular Modelling Hurdle in the Next-Generation Sequencing Era
Source: MDPI journal article supplement (doi:10.3390/ijms23137176), 2022-06-28
Supplement: s1 [file s1]

**Table S1.** Enrichment Analysis Omim Disease.

| Term                         | p-value                | q-value                |
|------------------------------|------------------------|------------------------|
| anemia                       | 8.900845503514137e-17  | 8.010760953162724e-15  |
| leukemia                     | 2.97309780471867e-14   | 1.3378940121234013e-12 |
| cardiomyopathy               | 3.9679132287527104e-11 | 1.1903739686258131e-09 |
| myopathy                     | 5.869720293780825e-11  | 1.3206870661006858e-09 |
| diabetes                     | 2.418530152306121e-10  | 4.3533542741510176e-09 |
| diabetes mellitus, type 2    | 3.7290647082693876e-10 | 5.593597062404081e-09  |
| blood                        | 1.0307979930551578e-09 | 1.3253117053566316e-08 |
| cardiomyopathy, hypertrophic | 8.399106171743645e-09  | 9.4489944432116e-08    |
| colorectal cancer            | 1.4984172874036155e-08 | 1.4050990228894967e-07 |
| cardiomyopathy, dilated      | 1.5854979700517008e-08 | 1.4050990228894967e-07 |
| immunodeficiency             | 1.7173432501982737e-08 | 1.4050990228894967e-07 |
| retinitis pigmentosa         | 6.833749727172472e-08  | 5.125312295379353e-07  |
| encephalopathy               | 2.2401907823160028e-07 | 1.5509013108341559e-06 |
| charcot-marie-tooth disease  | 4.152255358614041e-07  | 2.6693070162518835e-06 |
| cdeficiency                  | 6.691882092992156e-07  | 3.5594729153421218e-06 |
| glycogen storage disease     | 6.691882092992156e-07  | 3.5594729153421218e-06 |
| disorder of glycosylation    | 6.723448840090675e-07  | 3.5594729153421218e-06 |
| neuropathy                   | 9.52571937174924e-07   | 4.76285968587462e-06   |
| long qt syndrome             | 1.9987932960061957e-06 | 9.467968244239874e-06  |
| bardet-biedl syndrome        | 2.310538172150581e-06  | 1.0397421774677615e-05 |
| obesity                      | 4.269142597110605e-06  | 1.829632541618831e-05  |
| muscular dystrophy           | 4.720272733051294e-06  | 1.931020663520984e-05  |
| cataract                     | 5.4383211535268435e-06 | 2.1280387122496344e-05 |
| gastric cancer               | 5.9695806779447125e-06 | 2.2349465837044675e-05 |
| adenoma                      | 6.456512352924017e-06  | 2.2349465837044675e-05 |
| leigh syndrome               | 6.456512352924017e-06  | 2.2349465837044675e-05 |
| diabetes mellitus            | 7.879635137093125e-06  | 2.5327398654942187e-05 |
| epilepsy                     | 7.879635137093125e-06  | 2.5327398654942187e-05 |
| myocardial infarction        | 1.2721153115436082e-05 | 3.94794407030775e-05   |
| asthma                       | 1.4143757513532299e-05 | 4.2431272540596896e-05 |
| epidermolysis bullosa        | 1.7954358546894954e-05 | 5.049663341314206e-05  |
| leber amaurosis              | 1.7954358546894954e-05 | 5.049663341314206e-05  |
| macular degeneration         | 1.9821694656651207e-05 | 5.4059167245412376e-05 |
| lymphoma                     | 3.333036583989179e-05  | 8.351427918110758e-05  |
| parkinson disease            | 3.333036583989179e-05  | 8.351427918110758e-05  |
| hypogonadism                 | 3.340571167244303e-05  | 8.351427918110758e-05  |
| breast cancer                | 4.6111723066658075e-05 | 0.0001121636507026818  |
| thyroid carcinoma            | 4.965752478124495e-05  | 0.00011760992711347488 |
| deafness                     | 7.732298610928008e-05  | 0.00017843766025218478 |
| corneal dystrophy            | 8.694225006945731e-05  | 0.00019562006265627896 |
| mental retardation           | 0.0001963376965130264  | 0.00043098518746761895 |
| ichthyosis                   | 0.00036153323892730864 | 0.0007747140834156613  |
| dementia                     | 0.0005701702093571497  | 0.0011662572464123516  |
| skin/hair/eye pigmentation   | 0.0005701702093571497  | 0.0011662572464123516  |
| ataxia                       | 0.0012120519296486677  | 0.0024241038592973355  |
| ectodermal dysplasia         | 0.0014314931864819092  | 0.0026292731996606497  |

|                                               |                       |                       |
|-----------------------------------------------|-----------------------|-----------------------|
| ehlers-danlos                                 | 0.0014314931864819092 | 0.0026292731996606497 |
| hypothyroidism                                | 0.0014314931864819092 | 0.0026292731996606497 |
| thrombophilia                                 | 0.0014314931864819092 | 0.0026292731996606497 |
| hypertension                                  | 0.0015215665595955032 | 0.002738819807271906  |
| anomalies                                     | 0.0017241738593789223 | 0.0028736230989648706 |
| fanconi anemia                                | 0.0017241738593789223 | 0.0028736230989648706 |
| ovarian cancer                                | 0.0017241738593789223 | 0.0028736230989648706 |
| rheumatoid arthritis                          | 0.0017241738593789223 | 0.0028736230989648706 |
| cone-rod dystrophy                            | 0.0018960581428467006 | 0.0031026405973855102 |
| lung cancer                                   | 0.0019320108736484382 | 0.003105017475506419  |
| orofacial cleft                               | 0.001977196255800001  | 0.00312188882494737   |
| schizophrenia                                 | 0.0026187111595429176 | 0.004063517316532114  |
| zellweger syndrome                            | 0.004015473640482493  | 0.0061252987736173615 |
| dystonia                                      | 0.004114670322098158  | 0.006172005483147237  |
| malaria                                       | 0.004218584717340146  | 0.006224141386239559  |
| lateral sclerosis                             | 0.007778921022232993  | 0.011112744317475705  |
| microphthalmia                                | 0.007778921022232993  | 0.011112744317475705  |
| osteoporosis                                  | 0.009145253170131623  | 0.012860512270497594  |
| microcephaly                                  | 0.018085125140114407  | 0.02504094250169687   |
| fibrosis                                      | 0.019404835294583832  | 0.02646113903806886   |
| prostate cancer                               | 0.019778485377028875  | 0.026568114685561178  |
| systemic lupus erythematosus                  | 0.022633736356201938  | 0.02995641576556139   |
| arrhythmogenic right ventricular<br>dysplasia | 0.0357791342807951    | 0.046001744075307986  |
| melanoma                                      | 0.0357791342807951    | 0.046001744075307986  |
