# Supplementary material for: Molecular Modelling Hurdle in the Next-Generation Sequencing Era
Source: MDPI journal article supplement (doi:10.3390/ijms23137176), 2022-06-28
Supplement: s1 [file s1]

**Table S2.** SnpEFF Impact notation definition.

| <b>Impact</b>   | <b>Meaning</b>                                                  | <b>Example Type</b> | <b>Example Variant</b>                            |
|-----------------|-----------------------------------------------------------------|---------------------|---------------------------------------------------|
| <b>HIGH</b>     | The variant is assumed to have disruptive impact in the protein | Stop_gain           | IGSF·(NM_001007237.3):<br>c.1724G>A/ p.Trp575*    |
| <b>MODERATE</b> | Non-disruptive variant that might change protein effectiveness  | Missense            | DNAH3(NM_001347886.2):c.9<br>191A>G/ p.Asn3064Ser |
| <b>LOW</b>      | Variant unlikely to change protein behavior                     | Synonymous          | CDC27(NM_001256.6):c.1458T><br>C/ p.Asn486Asn     |
| <b>MODIFIER</b> | Non-coding variant where there is no evidence of impact         | 3'-UTR              | XPA(NM_000380.4):c.*203C>G                        |
